# Supplementary material for: The Modulation of Immune Responses in Tilapinevirus tilapiae-Infected Fish Cells through MAPK/ERK Signalling
Source: MDPI journal article supplement (doi:10.3390/v15040900), 2023-03-31
Supplement: s1 [file s1]

**Table S1:** Forward and reverse primers used in this study

| Genes   | Primer Sequence (5' – 3')                                      | Amplicon size (bp) | Accession number |
|---------|----------------------------------------------------------------|--------------------|------------------|
| TiLV    | F: CTGAGCTAAAGAGGCAATATGGATT<br>R: CGTGCGTACTCGTTCAGTATAAGTTCT | 112                | KU751816         |
| β-actin | F: GTGGGTATGGGTCAGAAAGAC<br>R: GTCATCCCAGTTGGTCACAATA          | 111                | XM003443127      |
| IL-1b   | F: TGGAGGAGGTGACGGATAAA<br>R: GGTGTCGCGTTTGTAGAAGA             | 86                 | XM031731335      |
| IL-8    | F: TCGCCACCTGTGAAGGCA<br>R: GCAGTGGGAGTTGGGAAGAAT              | 116                | NM001279704      |
| mx      | F: ACCCTTGAGCTGGTGAATCA<br>R: ATCCTGAGTGAATGCGGTCA             | 174                | XM003442686      |
| rsad2   | F: ATCAACTTCTCTGGCGGA<br>R: AGATAGACACCATATTTCTGGAAC           | 161                | XM003453237      |
